# Supplementary material for: Stability of peptide (P1 and P2) binding to a graphene sheet via an all-atom to all-residue coarse-grained approach
Source: Royal Society of Chemistry journal article supplement (doi:10.1039/c2sm25870f), 2012-01-01
Supplement: c2sm25870f.pdf [file c2sm25870f.pdf]

## Supplement

### Stability of peptide (P1, P2) binding to a graphene sheet via an all-atom to all-residue coarse-grained approach

R.B. Pandey,<sup>1</sup> Zhifeng Kuang,<sup>2</sup> B.L. Farmer,<sup>2</sup> Sang N. Kim,<sup>2</sup> Rajesh R. Naik<sup>2</sup>

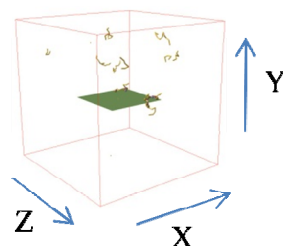

Figure S1: Graphene sheet (zx-plane) in presence of peptides to illustrate the orientations.

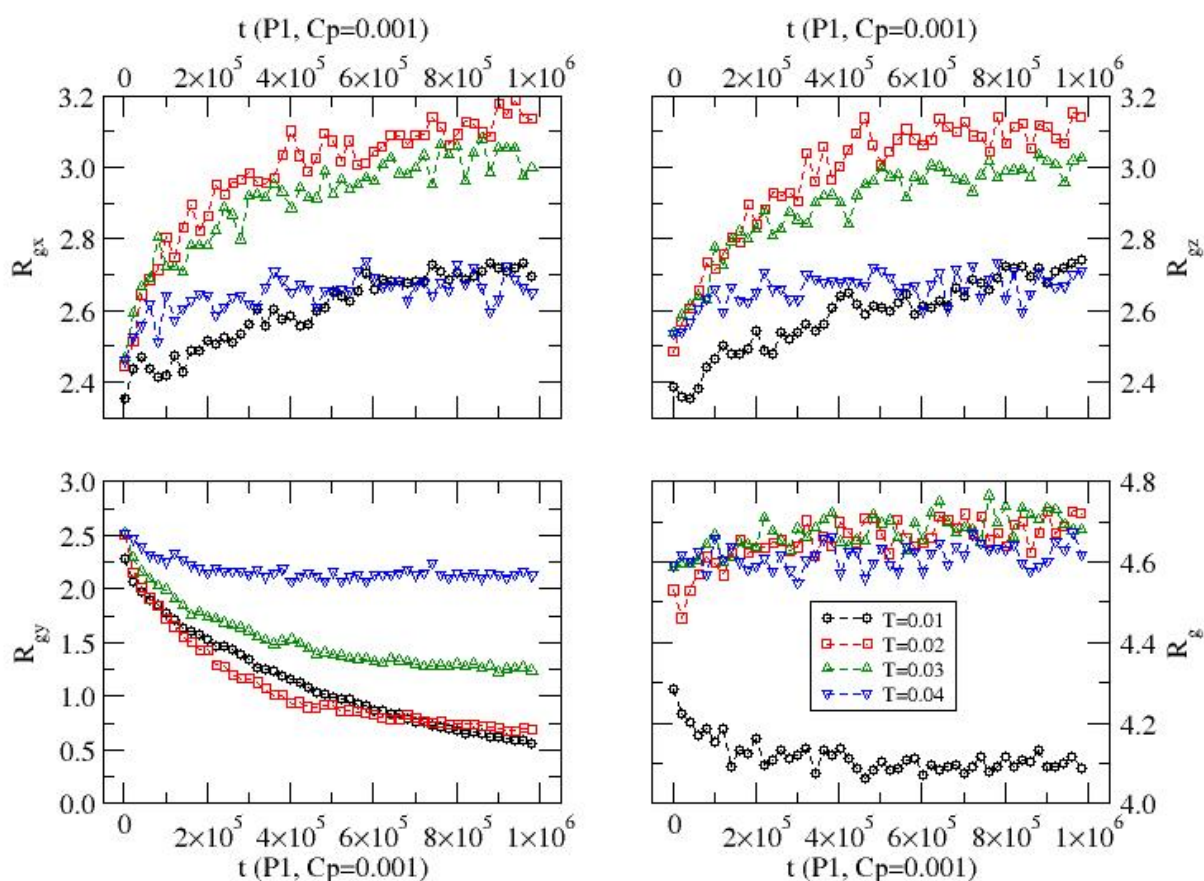

Figure S2: Variations of the average radius of gyration ( $R_g$ ) (and its components ( $R_{gx}$ ,  $R_{gy}$ ,  $R_{gz}$ )) of peptides P1 with the time steps at  $T=0.01-0.04$ ,  $C_p=0.001$ . Simulations are performed on a  $100^3$  lattice with 100 independent samples.

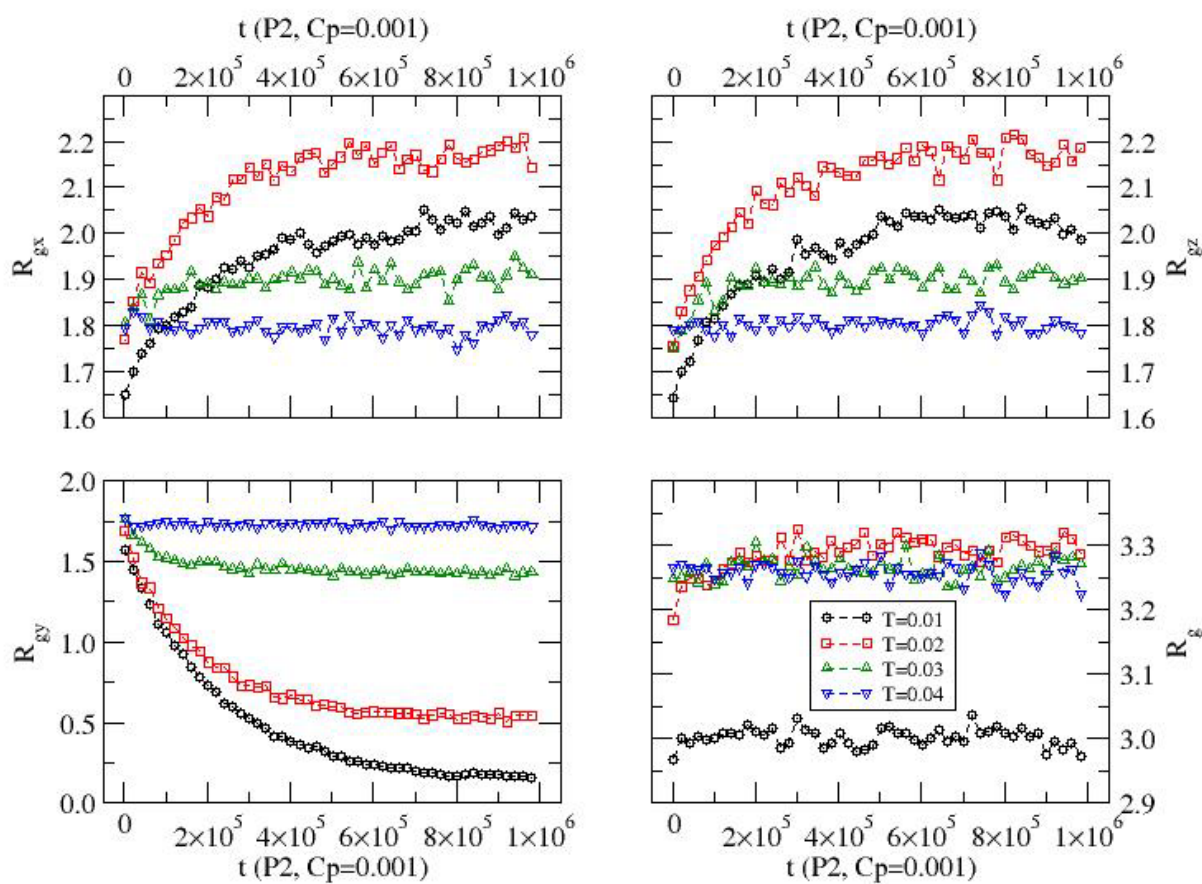

Figure S3: Variations of the average radius of gyration ( $R_g$ ) (and its components ( $R_{gx}$ ,  $R_{gy}$ ,  $R_{gz}$ )) of peptides P2 with the time steps at  $T=0.01-0.04$ ,  $C_p=0.001$ . Simulations are performed on a  $100^3$  lattice with 100 independent samples.
